# Supplementary material for: Recognition of host Clr-b by the inhibitory NKR-P1B receptor provides a basis for missing-self recognition
Source: PubMed Central journal article supplement (PMC6218473; doi:10.1038/s41467-018-06989-2), 2018-11-05
Supplement: 41467_2018_6989_MOESM1_ESM.pdf [file 41467_2018_6989_MOESM1_ESM.pdf]

# Recognition of host Clr-b by the inhibitory NKR-P1B receptor provides a basis for missing-self recognition

Gautham R. Balaji<sup>1,2#</sup>, Oscar A. Aguilar<sup>3,4#</sup>, Miho Tanaka<sup>3</sup>, Miguel A. Shingu-Vazquez<sup>1,2</sup>, Zihui Fu<sup>1,2</sup>, Benjamin S. Gully<sup>1,2</sup>, Lewis L. Lanier<sup>4</sup>, James R. Carlyle<sup>3\*</sup>, Jamie Rossjohn<sup>1,2,5\*</sup> & Richard Berry<sup>1,2\*</sup>

<sup>1</sup>Infection and Immunity Program and Department of Biochemistry and Molecular Biology, Biomedicine Discovery Institute, Monash University, Clayton, Victoria 3800, Australia

<sup>2</sup>ARC Centre of Excellence in Advanced Molecular Imaging, Monash University, Clayton, Victoria 3800, Australia

<sup>3</sup>Department of Immunology, University of Toronto, and Sunnybrook Research Institute, Toronto, ON, M4N 3M5, Canada

<sup>4</sup>Department of Microbiology and Immunology, University of California, San Francisco, CA, USA and Parker Institute for Cancer Immunotherapy, University of California, San Francisco, CA 94143, USA

<sup>5</sup>Institute of Infection and Immunity, Cardiff University School of Medicine, Heath Park, Cardiff CF14 4XN, U.K.

#Co-first authors. \*Jointly supervising authors. Correspondence and request for materials should be addressed to Richard Berry ([Richard.berry@monash.edu](mailto:Richard.berry@monash.edu)), Jamie Rossjohn ([Jamie.rossjohn@monash.edu](mailto:Jamie.rossjohn@monash.edu)) or James Carlyle ([james.carlyle@utoronto.ca](mailto:james.carlyle@utoronto.ca))

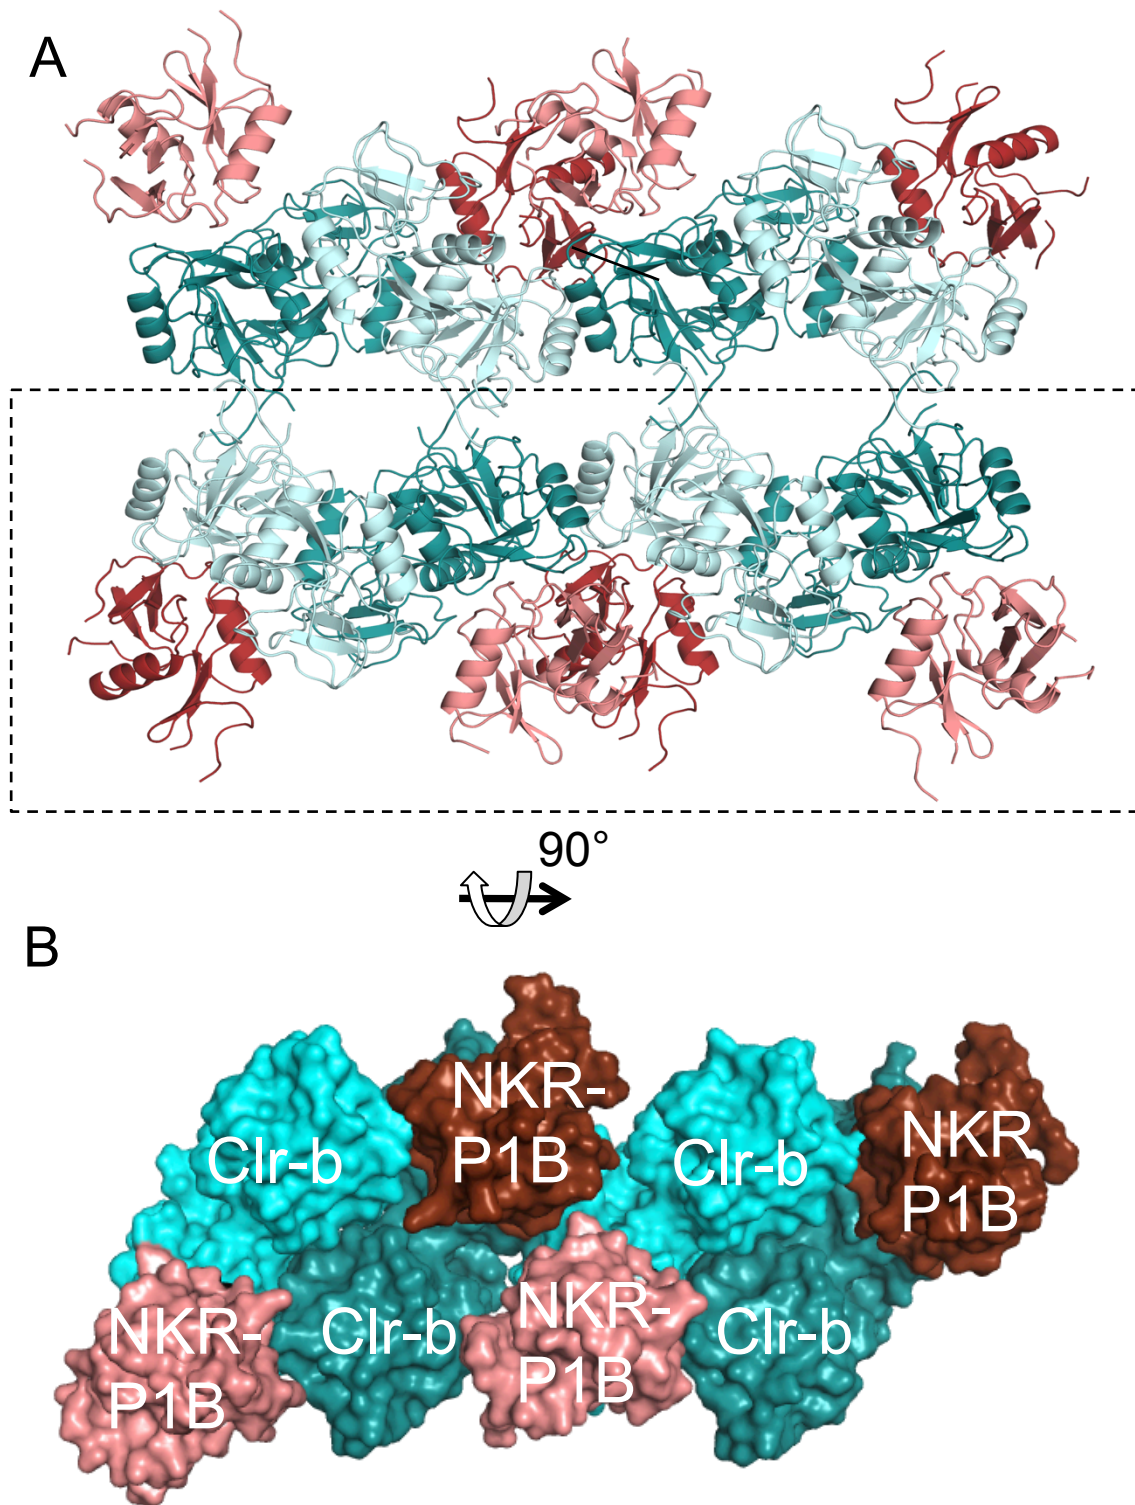

**Supplementary Fig. 1. The NKR-P1B:Clr-b asymmetric unit.** (A) Overview of the 8 NKR-P1B:Clr-b complexes visible within the crystallographic asymmetric unit. NKR-P1B is shown in salmon, while Clr-b is colored cyan. To aid in visualization, alternating NKR-P1B:Clr-b ‘complexes’ are colored in light and dark shades respectively. (B) Surface representation showing a top view of half of the crystallographic asymmetric unit (boxed region in (A)).

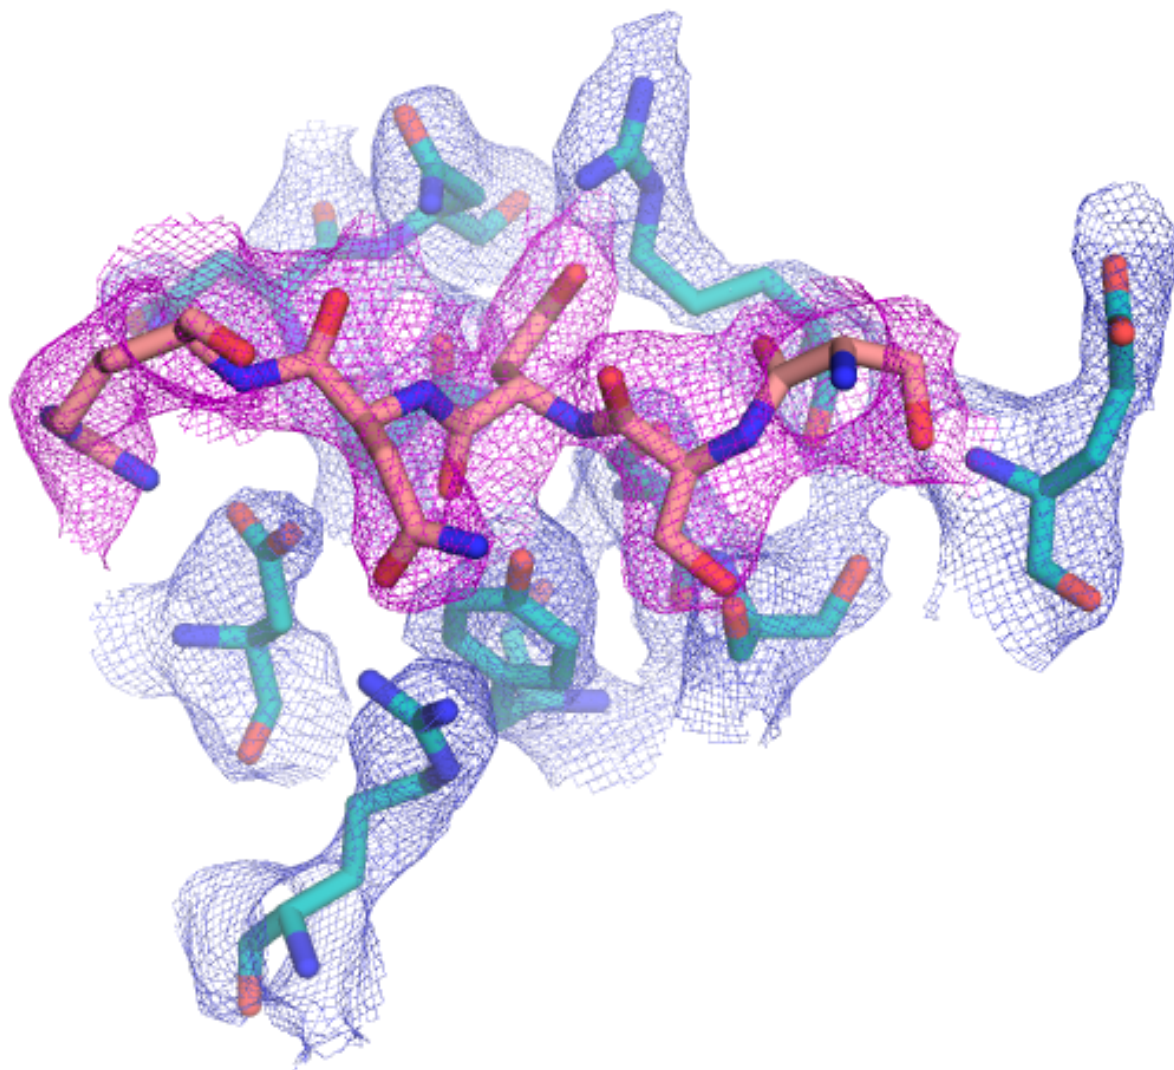

**Supplementary Fig. 2. Electron density at the NKR-P1B:Clr-b interface.** The  $2F_o - F_c$  electron density map (mesh) is shown contoured at  $1\sigma$  and colored blue for Clr-b and pink for NKR-P1B. The orientation shown is the same as in Fig 3E.

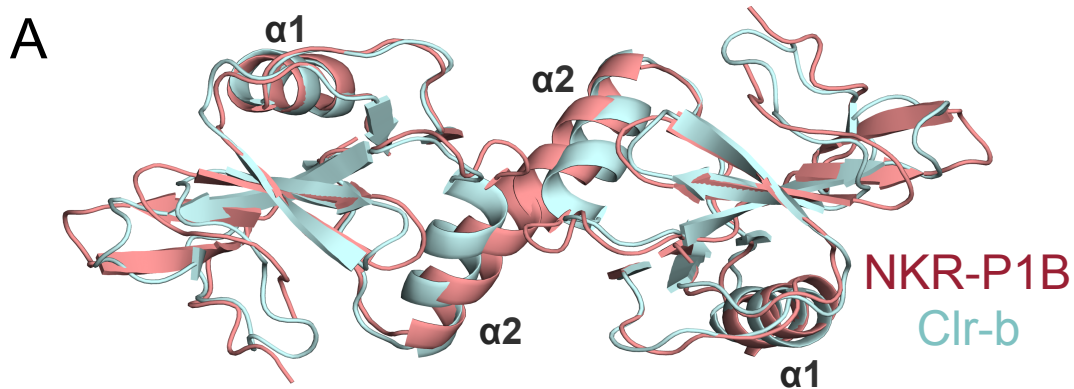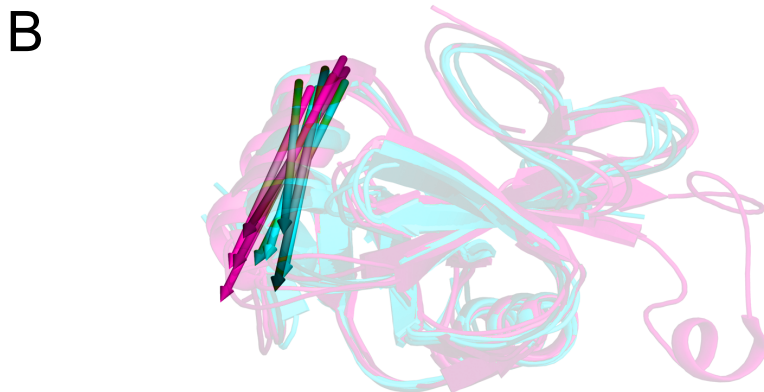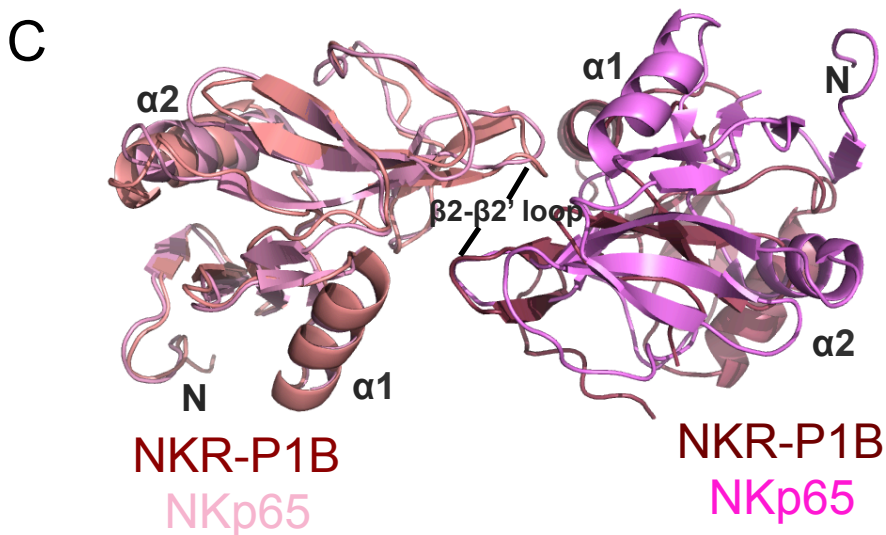

**Supplementary Figure 3. Homodimerization of NKR-P1B** (A) Overlay of two NKR-P1B monomers onto the Clr-b homodimer. The main structural difference between NKR-P1B and Clr-b - protrusion of the  $\alpha 2$  helix in NKR-P1B- is incompatible with the classic CTLD homodimer. (B) Overlay of a variety of CTLD-containing receptors and ligands. Molecules that have been reported to form a 'classic' CTLD homodimer (LLT1, KACL, Clr-g and CD69) are shown in shades of cyan, while those that do not form such an assembly (NKR-P1A, CLEC9A and NKp65) are shown in shades of magenta. The center of gravity of the  $\alpha 2$  helix is indicated by an arrow. (C) Comparison of the non-classical NKR-P1B homodimer to that of NKp65 (PDB ID: 4IOP). Each homodimer was aligned based only on the left-hand side protomer.



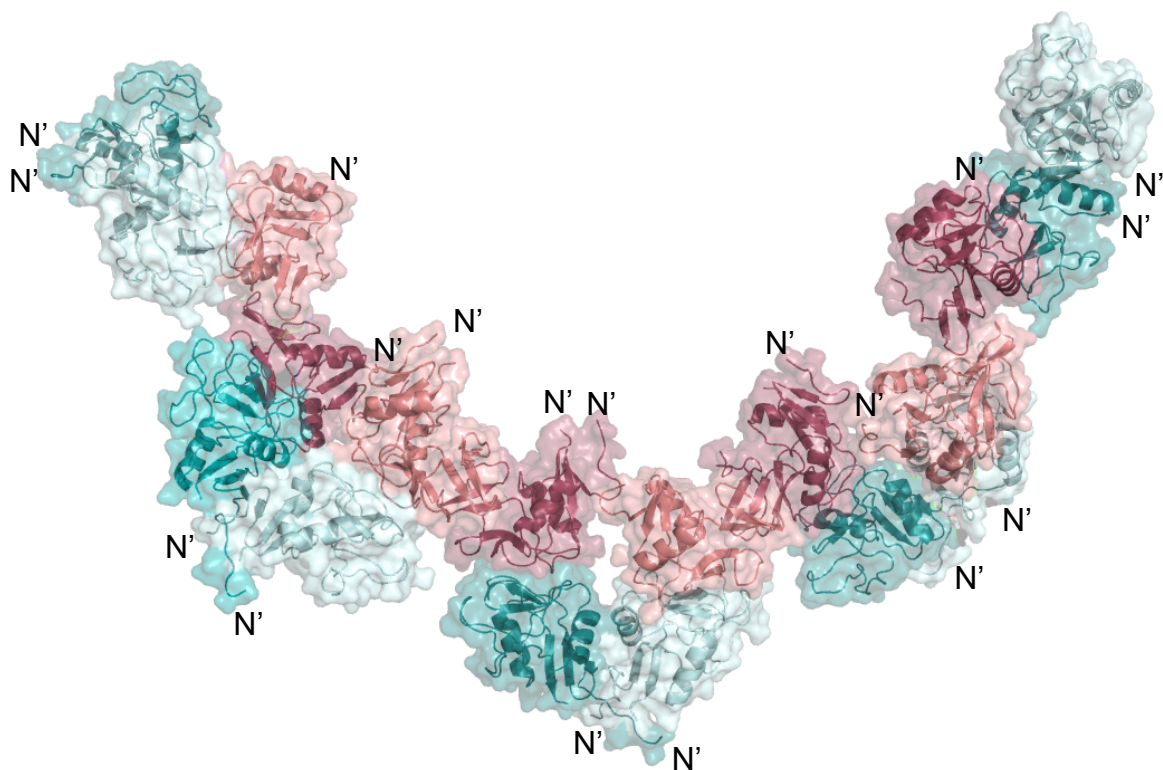

**Supplementary Figure 4. Model of a fully saturated NKR-P1B:Clr-b assembly.** The model was constructed using five classical Clr-b homodimers and four non-classical NKR-P1B homodimers in a manner such that all the NKR-P1B:Clr-b binding sites were occupied. NKR-P1B and Clr-b are shown in shades of salmon and cyan respectively.

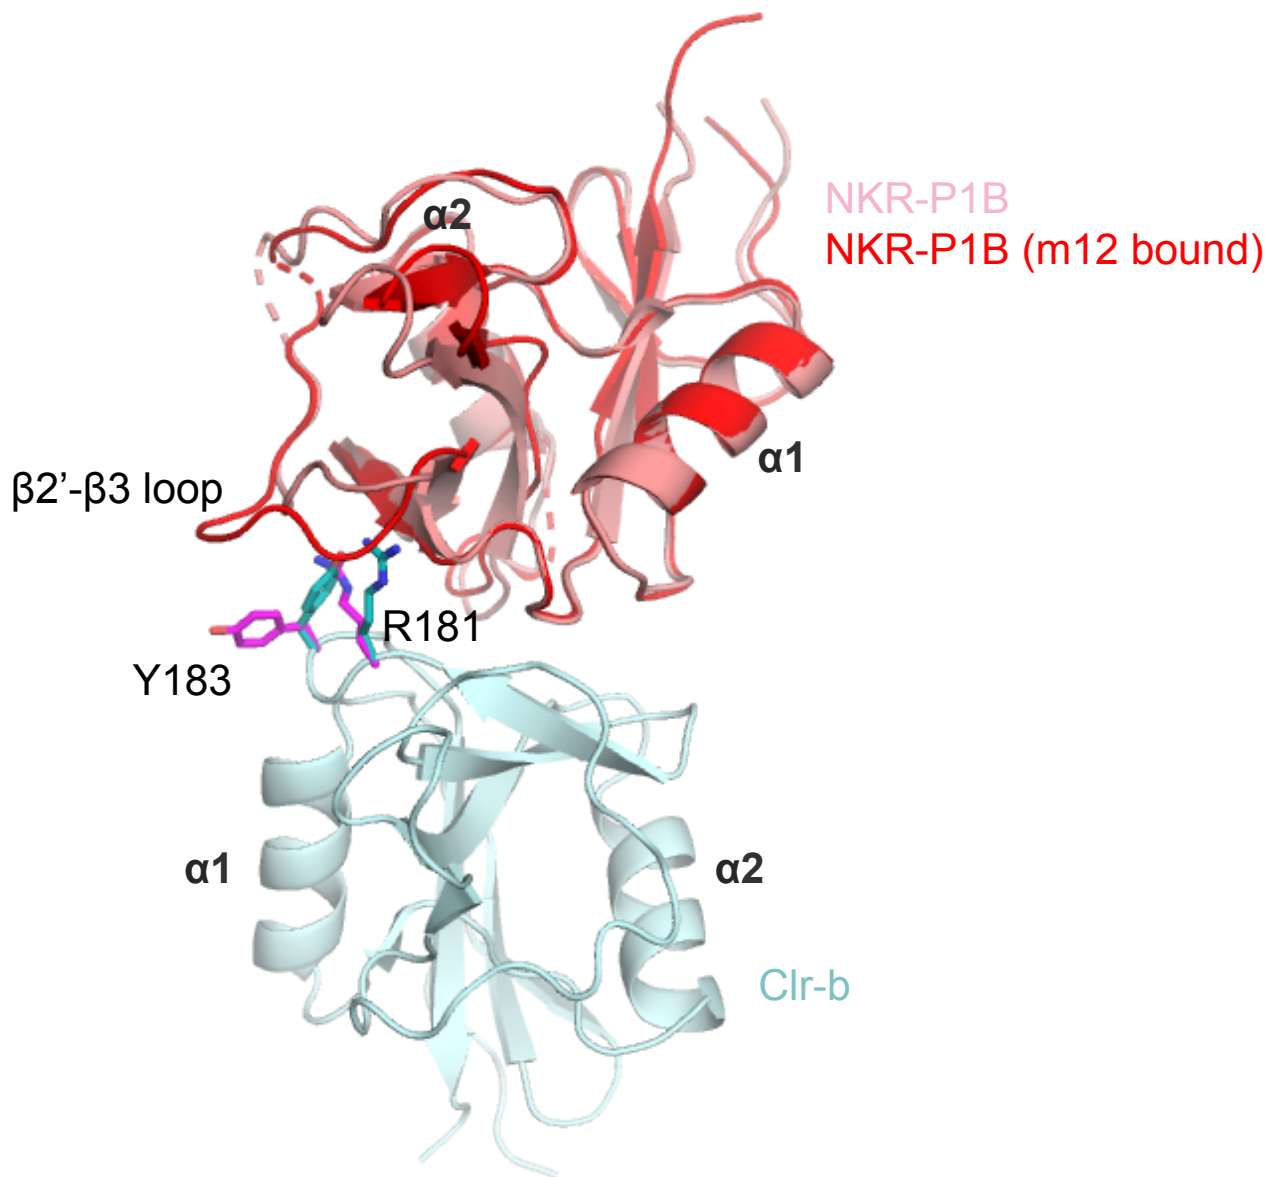

**Supplementary Figure 5. Plasticity at the NKR-P1B:Clr-b interface.** Overview of a monomer of NKR-P1B bound to a monomer of Clr-b. Side chain residues that change conformation relative to the unbound Clr-b structure (magenta) are shown as sticks. The structure of the m12-bound form of NKR-P1B (PDB ID: 5TZN) is also shown to highlight how the  $\beta 2'$ - $\beta 3$  loop remodels to accommodate Arg181 and Tyr183 of Clr-b.

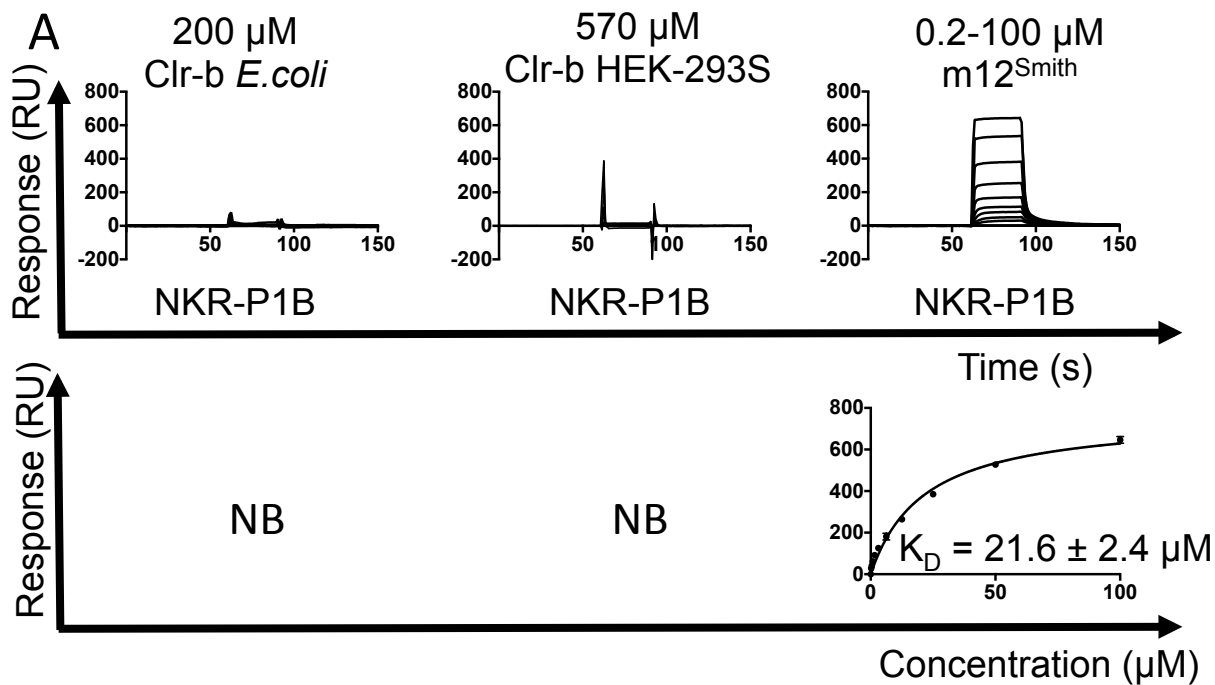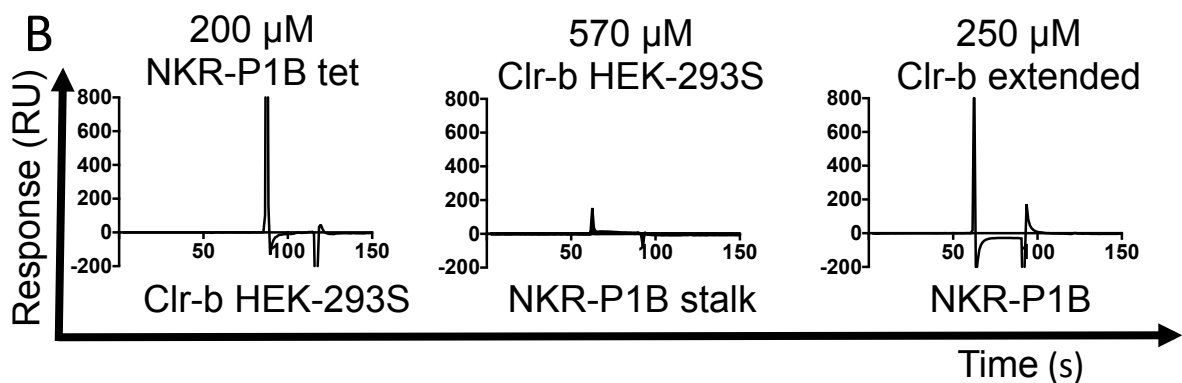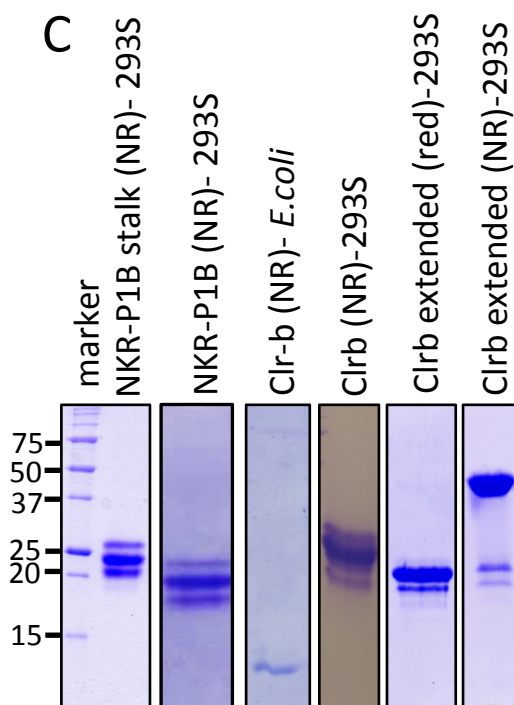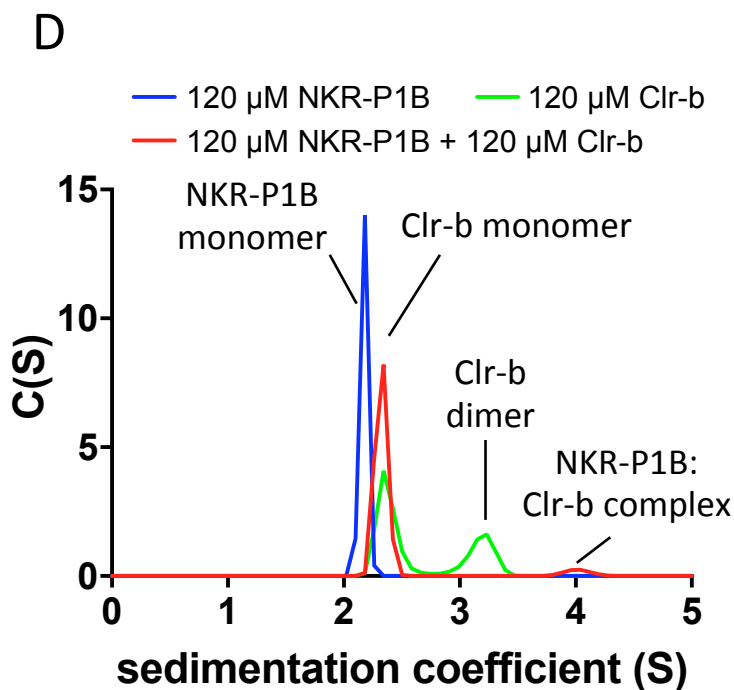

Supplementary Figure 6. Binding studies of NKR-P1B:Clr-b. (A) SPR analysis of

the NKR-P1B:Clr-b interaction. Sensograms (top) and equilibrium binding curves (bottom) for the binding of m12<sup>Smith</sup> and Clr-b to immobilized NKR-P1B are shown. Equilibrium binding curves represent the mean of 2 independent experiments, each performed in duplicate. Equilibrium dissociation constants ( $K_D$ ) and standard error of the mean (depicted as error bars) were calculated from the independent experiments. NB indicates no binding. (B) SPR sensograms showing the response to a variety of different NKR-P1B and Clr-b constructs. For (A) and (B), the analyte and ligand are labeled above and below each corresponding sensogram, respectively. All SPR sensograms are representative of two independent experiments performed. (C) SDS-PAGE analysis of the various NKR-P1B and Clr-b constructs tested in SPR/AUC. Samples were visualized under non-reducing conditions (NR) or in the presence of 5mM  $\beta$ -mercaptoethanol (red) as indicated. (D) Sedimentation velocity analytical ultracentrifugation analysis of the binding of mammalian expressed NKR-P1B-stalk and Clr-b. The identity of each species in the C(S) profile is indicated.



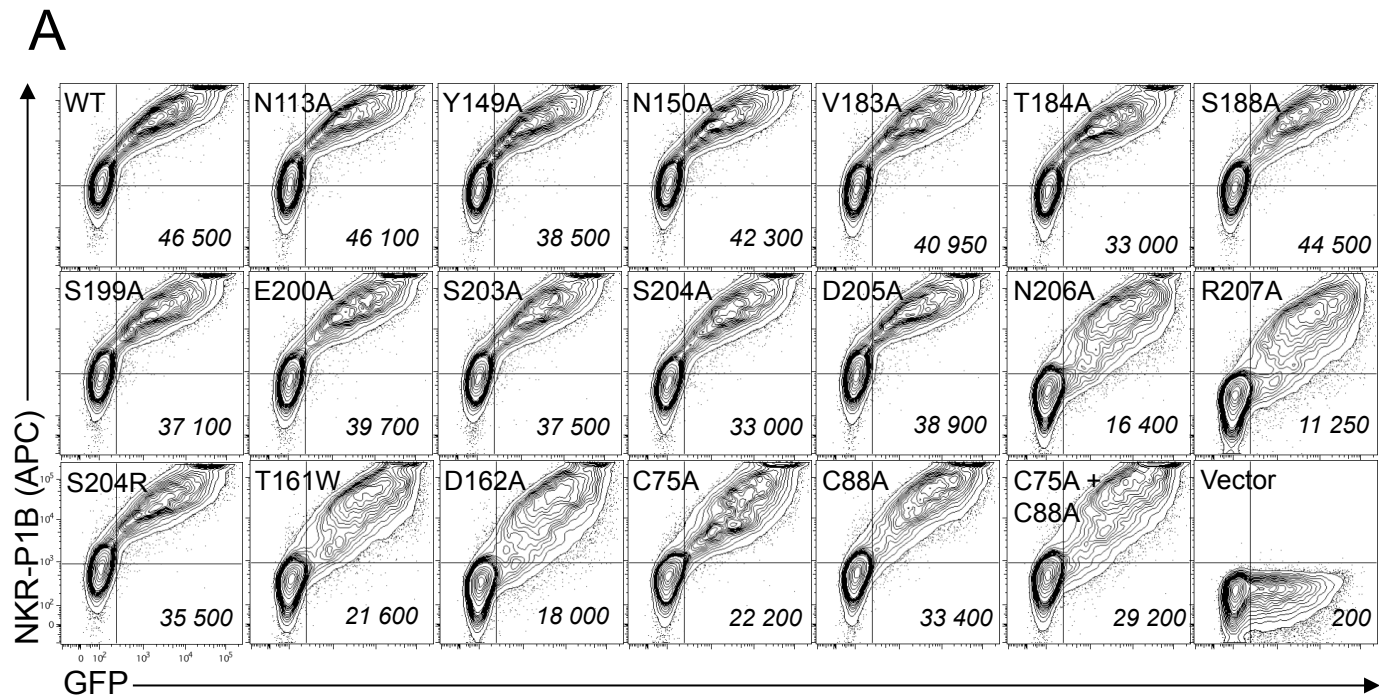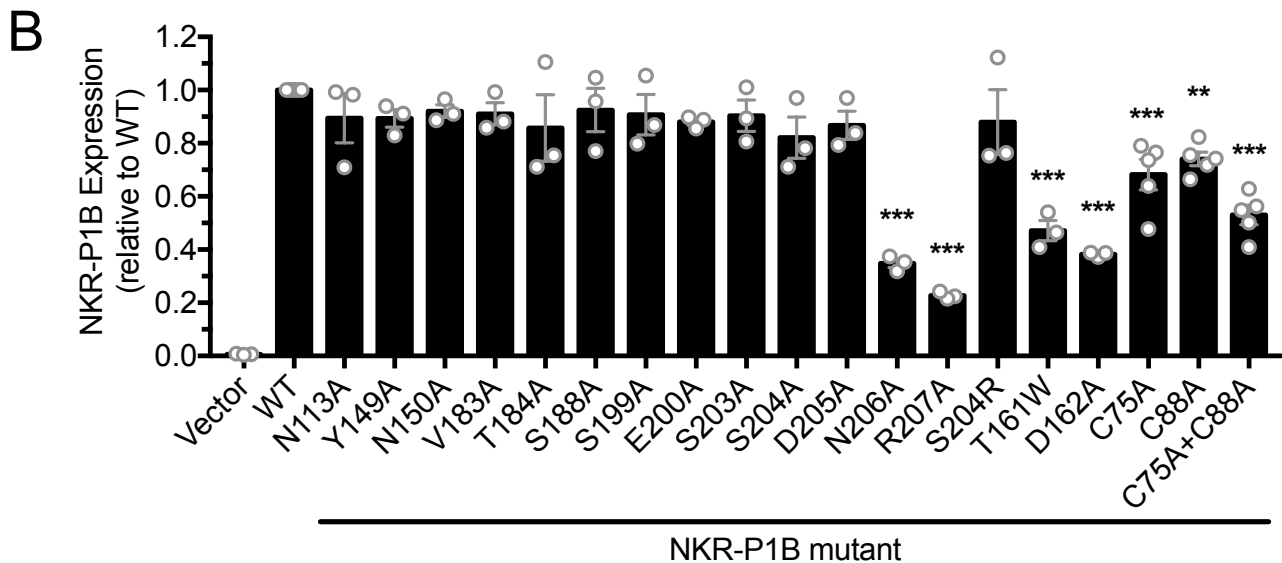

**Supplementary Figure 7. Cell surface expression of the NKR-P1B mutants.** (A) HEK293T cells were transfected with mammalian expression vector (pIRES2-EGFP) expressing the NKR-P1B mutants, and 48 hours later were analyzed by flow cytometry using the anti-NKR-P1B<sup>B6</sup> mAb, 2D12. GFP is expressed by the vector and is used to demonstrate transfection efficiency. Gates were drawn based on untransfected cells (GFP<sup>-</sup>/APC<sup>-</sup>). The mutant residues are displayed on the top left of the plots, whereas the italicized numbers on the bottom right represent median fluorescence intensity values. (B) Graphical representation of relative NKR-P1B expression on transfected cells (GFP<sup>+</sup>) in (A). Data were normalized to WT NKR-P1B expression and significant differences are shown between the WT and mutant allele for each graph. Data were analyzed using one-way ANOVA with Bonferroni post-hoc tests [ $F(20,50) = 23.25$ ,  $p < 0.0001$ ]. Significance intervals are depicted as \*\*  $p < 0.01$ , \*\*\*  $p < 0.001$ . All data are representative of at least 3 independent biological replicates. Data are presented as mean  $\pm$  SEM.

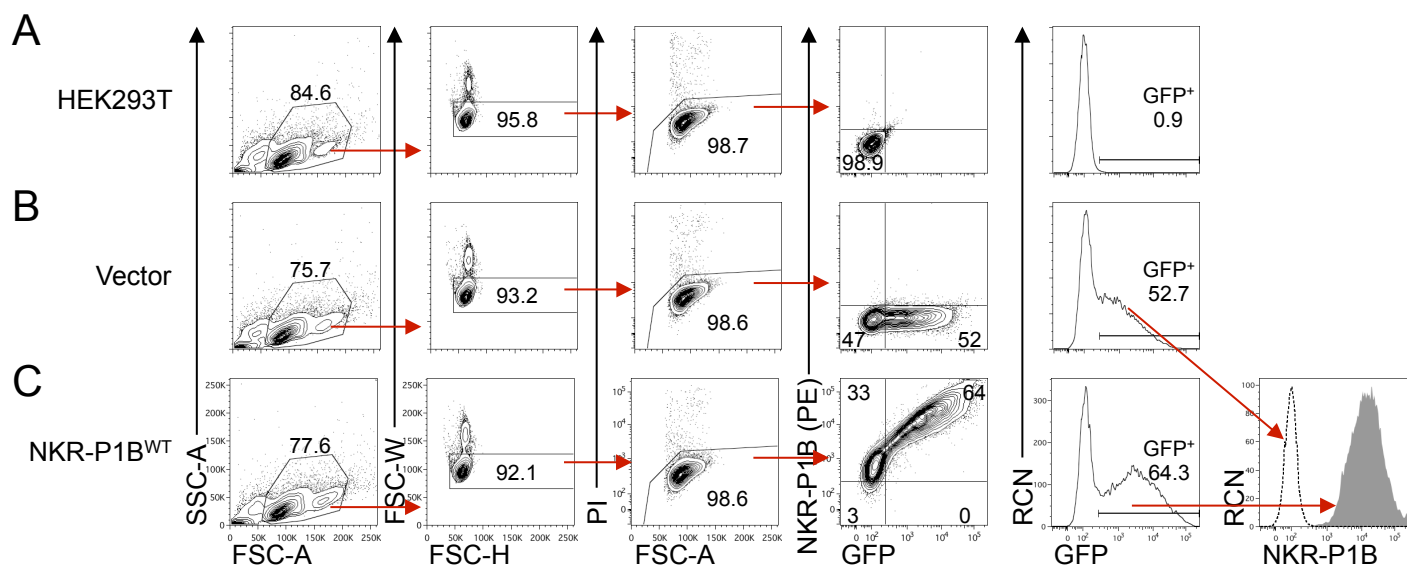

**Supplementary Figure 8.** Gating strategies for the flow cytometric analysis in this study. (A) Untransfected HEK293T cells and cells transfected with (B) empty pIRES2-EGFP vector or (C) NKR-P1B expressing vector were analyzed on flow cytometer. Untransfected HEK293T cells (top) were used to setup gates: cells were gated for doublet exclusion and viability (PI<sup>-</sup>, propidium iodide negative), then GFP<sup>+</sup> and NKR-P1B<sup>+</sup> (biotinylated 2D12 + streptavidin PE) gates were determined. 2D plots are visualized according to GFP and NKR-P1B expression. For histogram overlays, the GFP<sup>+</sup> gated cells from NKR-P1B transfectants were overlaid with vector controls (shown in D). Quantitation was obtained from GFP<sup>+</sup> cells in all experiments.

## Supplementary Tables

**Supplementary Table 1.** Contacts between Clr-b dimers.

| Clr-b (Chain G) | Clr-b (Chain H)        | Contact Type |
|-----------------|------------------------|--------------|
| Tyr77           | Ala78, Ala79, Cys80,   | VDW          |
| Ala78           | Tyr77, Ala78, Ala79,   | VDW          |
| Ala78           | Ala79                  | H-Bond (x2)  |
| Ala79           | Glu88                  | VDW          |
| Pro81           | Glu88                  | VDW          |
| Gln82           | Glu88                  | H-Bond       |
| Gln82           | Glu88                  | VDW          |
| Ile85           | Ile85, Gly86           | VDW          |
| Gly86           | Gly86                  | H-Bond (x2)  |
| Gly86           | Ile85, Gly86           | VDW          |
| Glu88           | Ala78, Asn83           | VDW          |
| Glu88           | Ala78                  | H-Bond       |
| Asn89           | Thr76, Tyr77           | VDW          |
| Phe94           | Arg129                 | VDW          |
| Phe126          | Tyr130                 | VDW          |
| Arg129          | Tyr130                 | VDW          |
| Arg129          | Tyr130                 | H-Bond       |
| Tyr130          | Phe126, Arg129, Tyr130 | VDW          |
| Tyr130          | Arg129                 | H-Bond       |
| Lys131          | Arg129                 | VDW          |
| Lys131          | Arg129                 | H-Bond       |
| Ala132          | Arg129                 | VDW          |
| Phe134          | Arg129                 | VDW          |
| Asn194          | Thr76, Tyr77, Ala79    | VDW          |
| Asn194          | Tyr77                  | H-Bond       |
| Ala195          | Met73, Lys75, Tyr77    | VDW          |

Atomic contacts were determined with CONTACT available within the CCP4i package. Van der Waals interactions were defined as non-hydrogen bonded contacts up to a distance of 4 Å. Hydrogen bond and salt bridge interactions were defined as contact distances of less than 3.5 Å or 4.5 Å respectively.

**Supplementary Table 2.** Contacts between NKR-P1B dimers.

| <b>NKR-P1B (Chain T)</b> | <b>NKR-P1B (Chain U)</b>                          | <b>Contact Type</b> |
|--------------------------|---------------------------------------------------|---------------------|
| Trp115                   | Thr161                                            | VDW                 |
| Arg119                   | Asp162                                            | Salt-Bridge         |
| Ser157                   | Thr161                                            | VDW                 |
| Thr159                   | Thr159                                            | VDW                 |
| Thr161                   | Trp115, Tyr158, Thr159,<br>Ser188, Cys189, Cys202 | VDW                 |
| Asp162                   | Tyr115, Lys116                                    | VDW                 |
| Asp162                   | Arg119                                            | Salt-Bridge         |
| Lys166                   | Arg119                                            | VDW                 |

Atomic contacts were determined with CONTACT available within the CCP4i package. Van der Waals interactions were defined as non-hydrogen bonded contacts up to a distance of 4 Å. Hydrogen bond and salt bridge interactions were defined as contact distances of less than 3.5 Å or 4.5 Å respectively.



**Supplementary Table 3.** Contacts between NKR-P1B and Clr-b.

| <b>NKR-P1B</b> | <b>Clr-b</b>                              | <b>Contact Type</b> |
|----------------|-------------------------------------------|---------------------|
| Ser112         | Asn175                                    | VDW                 |
| Ser112         | Asn175                                    | H-bond              |
| Asn113         | Arg164                                    | VDW                 |
| Tyr149         | Tyr97, Pro98                              | VDW                 |
| Val183         | Tyr183                                    | VDW                 |
| Thr184         | Arg181                                    | H-bond              |
| Thr184         | Arg181, Tyr183                            | VDW                 |
| Asn186         | Arg181                                    | VDW                 |
| Ser188         | Arg181                                    | VDW                 |
| Ser188         | Arg181                                    | H-bond (x2)         |
| Ser199         | Arg181                                    | H-bond              |
| Ser199         | Arg181, Tyr183                            | VDW                 |
| Ser199         | Tyr183                                    | H-bond              |
| Glu200         | Thr180, Arg181                            | VDW                 |
| Glu200         | Ser184                                    | VDW                 |
| Glu200         | Ser184                                    | H-bond              |
| Glu200         | Arg186                                    | Salt-Bridge (x2)    |
| Gly201         | Arg181                                    | H-bond (x2)         |
| Gly201         | Arg181                                    | VDW                 |
| Ser203         | Gly165, Glu166                            | VDW                 |
| Ser203         | Glu166                                    | H-bond              |
| Ser204         | Ser179, Thr180                            | VDW                 |
| Ser204         | Ser179                                    | H-bond              |
| Asp205         | Arg164, Tyr171,<br>Asn173, Asn175, Ser178 | VDW                 |
| Asp205         | Arg164                                    | Salt-Bridge (x2)    |
| Asp205         | Tyr171                                    | H-bond (x2)         |
| Asp205         | Asn173                                    | H-bond              |
| Asp205         | Asn175                                    | H-bond              |
| Asp205         | Ser178                                    | H-bond (x2)         |
| Asn206         | Arg186                                    | VDW                 |
| Asn206         | Arg186                                    | H-bond              |
| Arg207         | Asp135, Asn174                            | VDW                 |
| Arg207         | Asp135                                    | Salt-Bridge (x4)    |

Atomic contacts were determined with CONTACT available within the CCP4i package. Van der Waals interactions were defined as non-hydrogen bonded contacts up to a distance of 4 Å. Hydrogen bond and salt bridge interactions were defined as contact distances of less than 3.5 Å or 4.5 Å respectively.

**Supplementary Table 4.** List of PCR primers used in this study.

| <i>Construction of Nkrp1b<sup>B6</sup> mutants for reporter assays</i> |                         |                                                                                 |
|------------------------------------------------------------------------|-------------------------|---------------------------------------------------------------------------------|
| <b>Construct</b>                                                       | <b>Primer Name</b>      | <b>Sequence (5'→3')</b>                                                         |
| NKR-P1B CDS                                                            | Nkrp1b_B6<br>FXATG      | gaattcctcgagATGGATTCAACAACACTGGTC                                               |
|                                                                        | Nkrp1b_B6<br>RPTGA      | aaaactgcagTCAGGAGTCATTACACGGG                                                   |
| NKR-P1B NT-<br>FLAG tagged                                             | Nkrp1b_B6<br>FLAG-FXATG | gaattcctcgagATGGACTACAAGGACGACGACGACAAGGGAT<br>CAGGATCAATGGATTCAACAACACTGGTC    |
| Nkrp1b_N113A                                                           | 1_N113A Fwd             | CAAGTTTCCGCCACTTGGGAAG                                                          |
|                                                                        | 1_N113A Rev             | CTTCCAAGTGCGGAAACTTG                                                            |
| Nkrp1b_Y149A                                                           | 2_Y149A Fwd             | GGAAAAAGCCAATTCATTTTGG                                                          |
|                                                                        | 2_Y149A Rev             | CCAAAATGAATTGGCTTTTTTCC                                                         |
| Nkrp1b_N150A                                                           | 3_N150A Fwd             | GGAAAATACGCCTCATTTTGG                                                           |
|                                                                        | 3_N150A Rev             | CCAAAATGAGGCGTATTTTTTCC                                                         |
| Nkrp1b_V183A                                                           | 4_V183A Fwd             | CACTGGTGCCACTGAAAATGG                                                           |
|                                                                        | 4_V183A Rev             | CCATTTTCAGTGGCACCAGTG                                                           |
| Nkrp1b_T184A                                                           | 5_T184A Fwd             | CACTGGTGTGCGCGAAAATGG                                                           |
|                                                                        | 5_T184A Rev             | CCATTTTCGCGACACCAGTG                                                            |
| Nkrp1b_S188A                                                           | 6_S188A Rev1            | GATCCAACGGTTGTCTGAAGAACAGCCCTCAGAAGTCAC<br>TTTTTCTCCTGAGATGGCGGCACAGGCGCC       |
|                                                                        | 6_S188A Rev2            | aaaactgcagTCAGGAGTCATTACACGGGGTTTCATGGTTTA<br>GTTCCTTTTGGCAGATCCAACGGTTGTC      |
| Nkrp1b_S199A                                                           | 7_S199A Rev1            | GGTTTAGTTCCTTTTGGCAGATCCAACGGTTGTCTGAAGA<br>ACAGCCCTCGGCAGTCAC                  |
| Nkrp1b_E200A                                                           | 8_E200A Rev1            | GGTTTAGTTCCTTTTGGCAGATCCAACGGTTGTCTGAAGA<br>ACAGCCGGCAGAAG                      |
| Nkrp1b_S203A                                                           | 9_S203A Rev1            | GGTTTAGTTCCTTTTGGCAGATCCAACGGTTGTCTGAGGC<br>ACAGCC                              |
| Nkrp1b_S204A                                                           | 10_S204A Rev1           | GGTTTAGTTCCTTTTGGCAGATCCAACGGTTGTGCGCAGA<br>ACAGCC                              |
|                                                                        | 7-10+15_S199-<br>204 R2 | aaaactgcagTCAGGAGTCATTACACGGGGTTTCATGGTTTA<br>GTTCCTTTTGG                       |
| Nkrp1b_D205A                                                           | 11_D205A Rev            | aaaactgcagTCAGGAGTCATTACACGGGGTTTCATGGTTTA<br>GTTCCTTTTGGCAGATCCAACGGTTGGCTGAAG |
| Nkrp1b_N206A                                                           | 12_N206A Rev            | aaaactgcagTCAGGAGTCATTACACGGGGTTTCATGGTTTA<br>GTTCCTTTTGGCAGATCCAACGGGCGTCTG    |
| Nkrp1b_R207A                                                           | 13_R207A Rev            | aaaactgcagTCAGGAGTCATTACACGGGGTTTCATGGTTTA<br>GTTCCTTTTGGCAGATCCAGGCGTTGTC      |
| Nkrp1b_D162A                                                           | 14_D162A Fwd            | CATTAACAGCCATGAACTGG                                                            |
|                                                                        | 14_D162A Rev            | CCAGTTCATGGCTGTTAATG                                                            |
| Nkrp1b_S204R                                                           | 15_S204R Rev1           | CATGGTTTAGTTCCTTTTGGCAGATCCAACGGTTGTCCCT<br>AGAACAGCC                           |
| Nkrp1b_T161W                                                           | 23_T161W Fwd            | ACACATTAAtggGACATGAACTG                                                         |
|                                                                        | 23_T161W Rev            | CAGTTCATGTCccaTAATGTGT                                                          |
| Nkrp1b_C75A                                                            | 24_C75A Fwd             | GTACAAAAAATCGCCGCGGATGTTC                                                       |
|                                                                        | 24_C75A Rev             | GAACATCCGCGGCGATTTTTTGTAC                                                       |
| Nkrp1b_C88A                                                            | 25_C88A Fwd             | CATACAACAGGTGCCTCAGCTAAGC                                                       |
|                                                                        | 25_C88A Rev             | GCTTAGCTGAGGCACCTGTTGTATG                                                       |

|                                                                          |                    |                                                               |
|--------------------------------------------------------------------------|--------------------|---------------------------------------------------------------|
| Nkrp1b_C75+88A                                                           | 26_C75/88A<br>Fwd  | TCGCCGCGGATGTTCAAGAGAACAGAACACATACAACAG<br>GTGCCTC            |
|                                                                          | 26_C75/88A<br>Rev  | GAGGCACCTGTTGTATGTGTTCTGTTCTTGAACATCCG<br>CGGCGA              |
| <i>Cloning of Clr-b</i>                                                  |                    |                                                               |
| <b>Construct</b>                                                         | <b>Primer Name</b> | <b>Sequence (5'→3')</b>                                       |
| Clr-b CDS                                                                | Clr-b FXATG        | gaattcctcgagATGTGTGTCACAAAGGCTTCC                             |
|                                                                          | Clr-b RBTGA        | gcgaaggatccCTAGGAAGGAAAAAAGGAGTT                              |
| <i>Generation of CD3ζ-Clr-b Type II MSCV vector</i>                      |                    |                                                               |
| <b>Construct</b>                                                         | <b>Primer Name</b> | <b>Sequence (5'→3')</b>                                       |
| Clr-b ectodomain                                                         | Clr-b EC X-Fwd     | gaattcctcgagAAGACAGAACAGATCCAG                                |
|                                                                          | Clr-b EC N-Rev     | ataagaatgcggccgcCTAGGAAGGAAAAAAGGAG                           |
| <i>Construction of Nkrp1b<sup>B6</sup> mutants for tetramer staining</i> |                    |                                                               |
| <b>Construct</b>                                                         | <b>Primer Name</b> | <b>Sequence (5'→3')</b>                                       |
| NKR-P1B <sup>B6</sup> N113A                                              | N113A forward      | GTGAGCCAGGTATCCGCTACTTGGAAAAGAGGG                             |
| NKR-P1B <sup>B6</sup> N113A                                              | N113A reverse      | CCCTCTTTCCAAGTAGCGGATACCTGGCTCAC                              |
| NKR-P1B <sup>B6</sup> N149A                                              | N149A forward      | GCATTAAAGAGAAAGCTAATTCATTTTGGATTG                             |
| NKR-P1B <sup>B6</sup> N149A                                              | N149A reverse      | CAATCCAAAATGAATTAGCTTTCTCTTTAATGC                             |
| NKR-P1B <sup>B6</sup> N150A                                              | N150A forward      | CATTAAAGAGAAATATGCTTCATTTTGGATTGG                             |
| NKR-P1B <sup>B6</sup> N150A                                              | N150A reverse      | CCAATCCAAAATGAAGCATATTTCTCTTTAATG                             |
| NKR-P1B <sup>B6</sup> D162A                                              | D162A forward      | CATATACATTGACCGCCATGAACTGGAAGTGG                              |
| NKR-P1B <sup>B6</sup> D162A                                              | D162A reverse      | CCACTTCCAGTTCATGGCGGTCAATGTATATG                              |
| NKR-P1B <sup>B6</sup> V183A                                              | V183A forward      | GAAGATCACAGGTGCCACTGAAAATGGCAG                                |
| NKR-P1B <sup>B6</sup> V183A                                              | V183A reverse      | GCCATTTTCAGTGGCACCTGTGATCTTCAG                                |
| NKR-P1B <sup>B6</sup> T184A                                              | T184A forward      | GAAGATCACAGGTGTCGCTGAAAATGGCAGTTGTG                           |
| NKR-P1B <sup>B6</sup> T184A                                              | T184A reverse      | CAACTGCCATTTTCAGCGACACCTGTGATCTTC                             |
| NKR-P1B <sup>B6</sup> S188A                                              | S188A forward      | GTCAGTAAAATGGCGCTTGTGCTGCCATAAG                               |
| NKR-P1B <sup>B6</sup> S188A                                              | S188A reverse      | CTTATGGCAGCACAAAGCGCCATTTTCAGTGAC                             |
| NKR-P1B <sup>B6</sup> S199A                                              | S199A forward      | GGGGAGAAGGTCACCGCAGAAGGCTGCTCATC                              |
| NKR-P1B <sup>B6</sup> S199A                                              | S199A reverse      | GATGAGCAGCCTTCTGCGGTGACCTTCTCCCC                              |
| NKR-P1B <sup>B6</sup> E200A                                              | E200A forward      | GAGAAGGTCACCTCAGCAGGCTGCTCATCAGATAAC                          |
| NKR-P1B <sup>B6</sup> E200A                                              | E200A reverse      | GTTATCTGATGAGCAGCCTGCTGAGGTGACCTTCTC                          |
| NKR-P1B <sup>B6</sup> S203A                                              | S203A forward      | CCTCAGAAGGCTGCGCATCAGATAACAGGTGG                              |
| NKR-P1B <sup>B6</sup> S203A                                              | S203A reverse      | CCACTGTTATCTGATGCGCAGCCTTCTGAGG                               |
| NKR-P1B <sup>B6</sup> S204A                                              | S204A forward      | CTCAGAAGGCTGCTCAGCAGATAACAGGTGGATATG                          |
| NKR-P1B <sup>B6</sup> S204A                                              | S204A reverse      | CATATCCACCTGTTATCTGCTGAGCAGCCTTCTGAG                          |
| NKR-P1B <sup>B6</sup> D205A                                              | D205A forward      | GAAGGCTGCTCATCAGCTAACAGGTGGATATG                              |
| NKR-P1B <sup>B6</sup> D205A                                              | D205A reverse      | GCATATCCACCTGTTAGCTGATGAGCAGCCTTC                             |
| NKR-P1B <sup>B6</sup> N206A                                              | N206A forward      | GGCTGCTCATCAGATGCTAGGTGGATATGCCAG                             |
| NKR-P1B <sup>B6</sup> N206A                                              | N206A reverse      | CTGGCATATCCACCTAGCATCTGATGAGCAGCC                             |
| NKR-P1B <sup>B6</sup> R207A                                              | R207A forward      | GCTCATCAGATAACGCGTGGATATGCCAGAAG                              |
| NKR-P1B <sup>B6</sup> R207A                                              | R207A reverse      | CTTCTGGCATATCCACGCTTATCTGATGAGC                               |
| NKR-P1B <sup>B6</sup> S204R                                              | S204R forward      | CAGAAGGCTGCTCAAGAGATAACAGGTGGATATG                            |
| NKR-P1B <sup>B6</sup> S204R                                              | S204R reverse      | CATATCCACCTGTTATCTCTTGAGCAGCCTTCTG                            |
| <i>Generation of extended NKR-P1B</i>                                    |                    |                                                               |
| <b>Construct</b>                                                         | <b>Primer Name</b> | <b>Sequence (5'→3')</b>                                       |
| NKR-P1B<br>extended                                                      | NKR-P1B ext        | CTCGTGGTACCACTATCATTGCAAGG<br>GGTCTCATGGTTCAGCTCCTTCTGGCATATC |

| <i>Generation of extended Clr-b</i> |                    |                                                                                            |
|-------------------------------------|--------------------|--------------------------------------------------------------------------------------------|
| <b>Construct</b>                    | <b>Primer Name</b> | <b>Sequence (5'→3')</b>                                                                    |
| Clr-b extended                      | Clr-b S207 Rev     | CTCGTCCTCGAGTTAGGTACCGCTCGGA<br>AAGAAAGGAGTCTGGCAATGAAGAGAG<br>TAAGAGTTCAGTTTTGAGCAAATCCAC |
